# Supplementary material for: An investigation on a WO3/MoO3−x heterojunction photocatalyst for excellent photocatalytic performance and enhanced molecular oxygen activation ability
Source: Royal Society of Chemistry journal article supplement (doi:10.1039/d3re00396e), 2023-09-15
Supplement: d3re00396e1.pdf [file d3re00396e1.pdf]

## An investigation on $\text{WO}_3/\text{MoO}_{3-x}$ heterojunction photocatalyst for excellent photocatalytic performance and enhanced molecular oxygen activation ability

Yuxuan Shao,<sup>a</sup> Dan You,<sup>a\*</sup> Yuqi Wan,<sup>a,b</sup> Qingrong Cheng,<sup>a\*</sup> and Zhiquan Pan<sup>a</sup>

<sup>a</sup> Engineering Research Center of Phosphorous Development and Utilization of Ministry of Education, Wuhan Institute of Technology, Wuhan, 430205, PR China.

<sup>b</sup> The Department of Electrical and Electronic Engineering, The University of Hong Kong, Hong Kong, 999077, PR China.

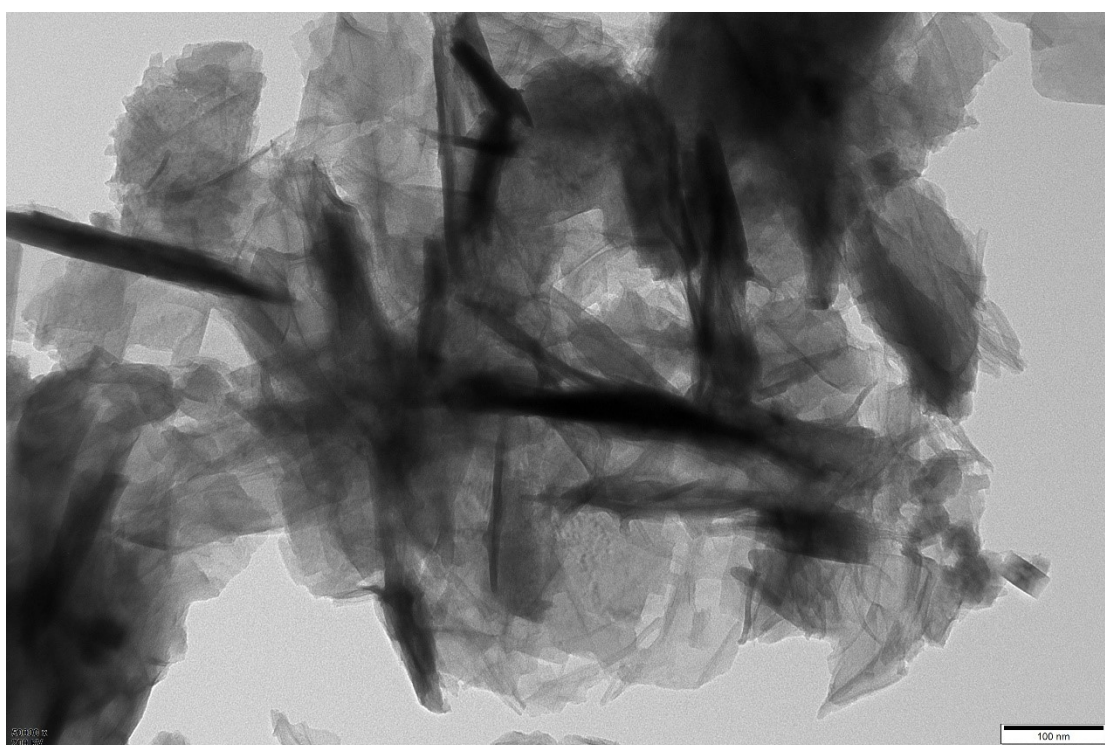

**Fig.S1** The TEM image of  $\text{WOM}_{83\%}$ .

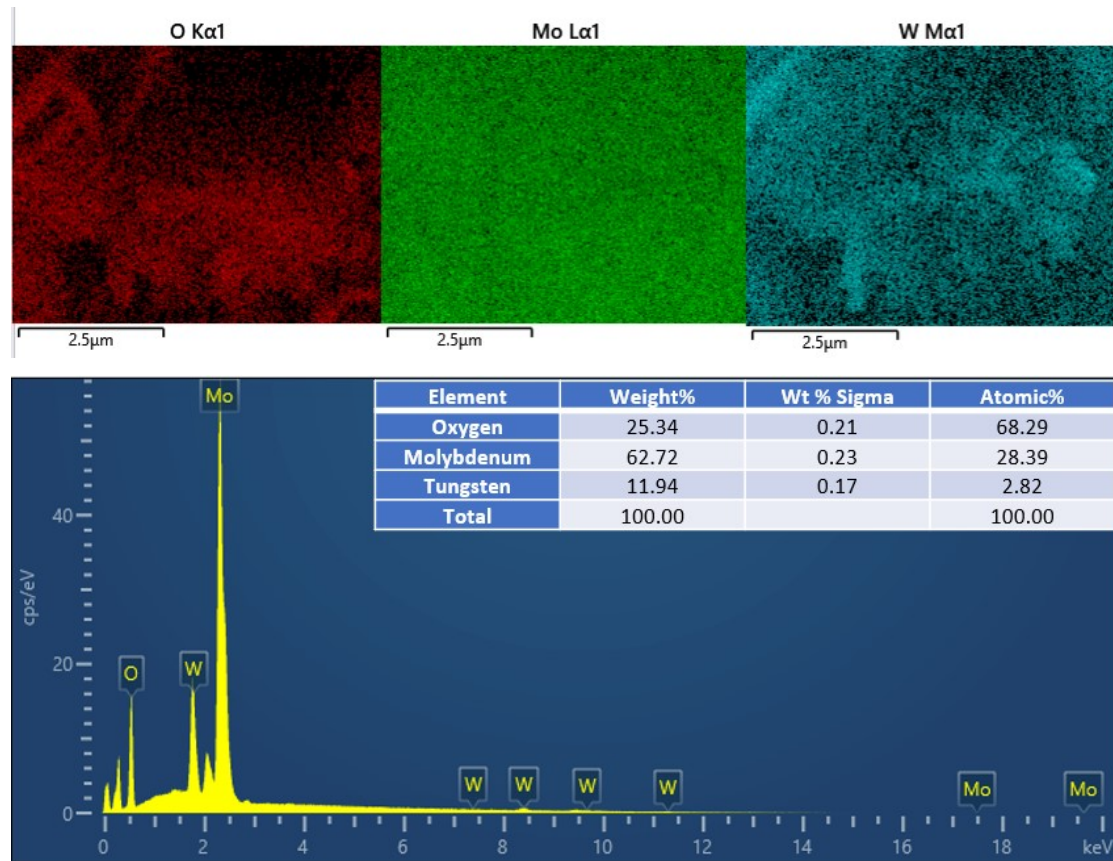

Fig.S2 O, Mo and W SEM EDX mapping of WOM<sub>83%</sub>.

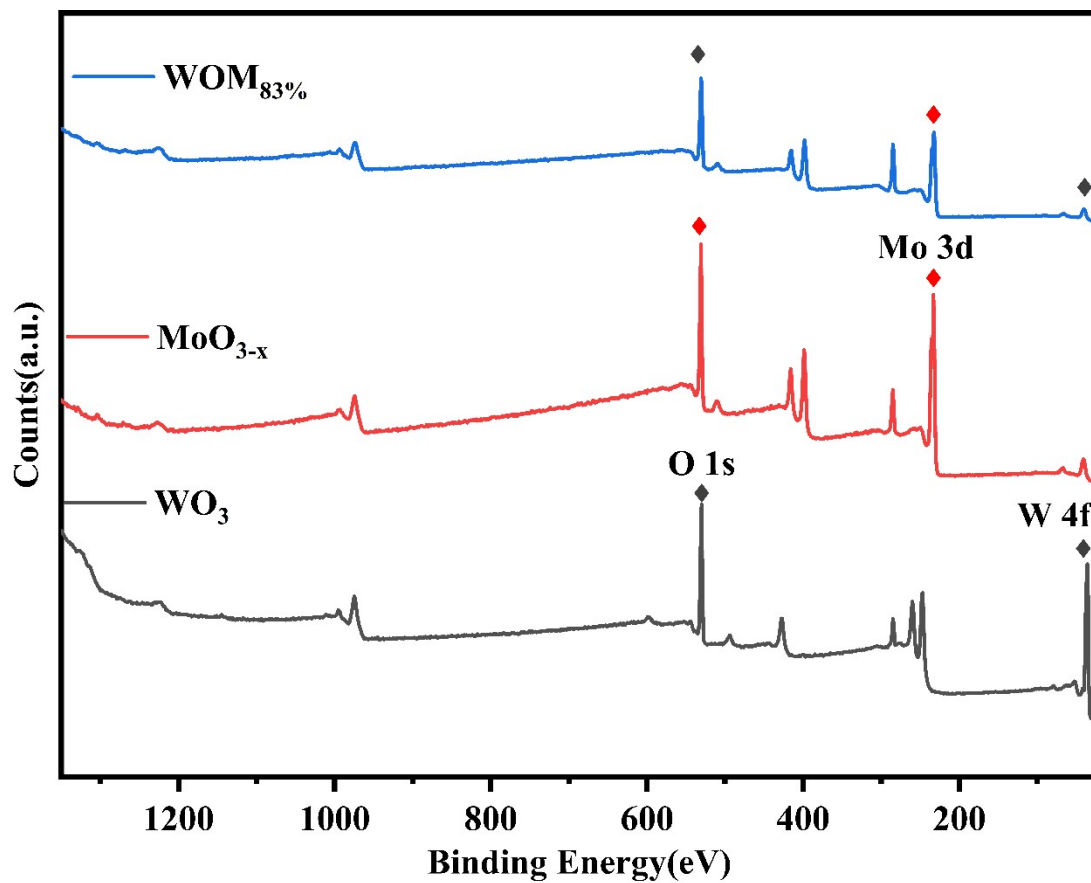

**Fig. S3** XPS spectra of  $WO_3$ ,  $MoO_{3-x}$  and  $WOM_{83\%}$ .

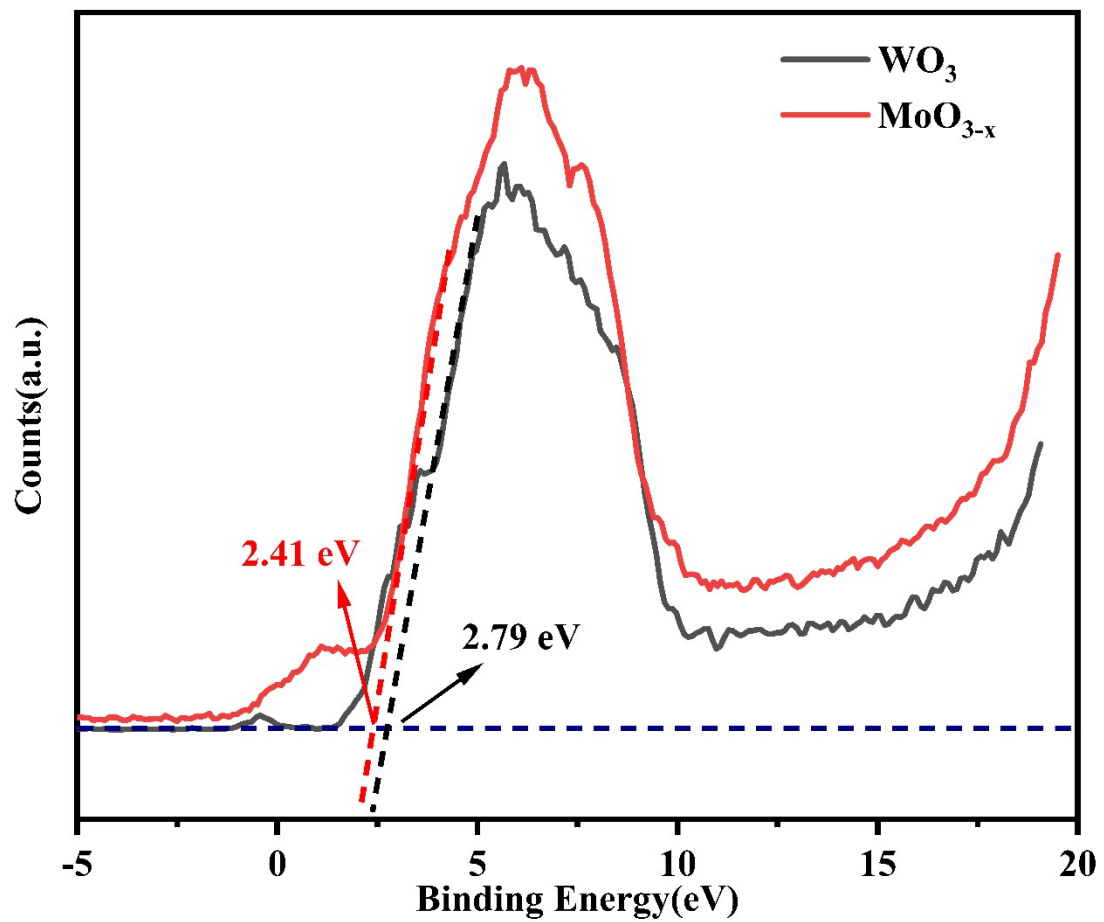

**Fig.S4** VB-XPS spectra of  $\text{WO}_3$  and  $\text{MoO}_{3-x}$ .

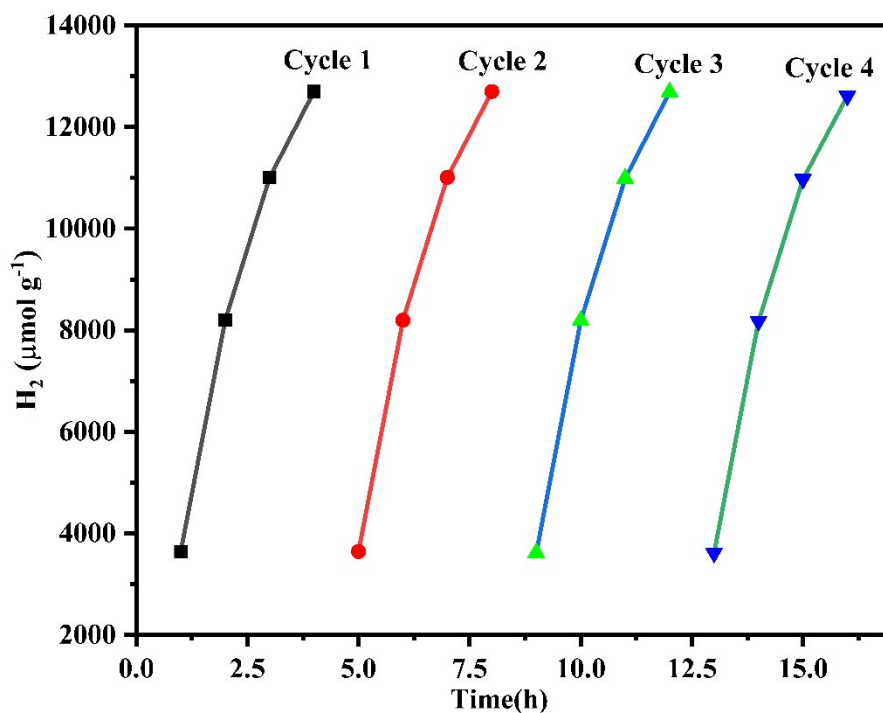

**Fig. S5** Photocatalytic H<sub>2</sub> production activity over WOM<sub>83%</sub> for 4 consecutive cycles in every 4h time interval.

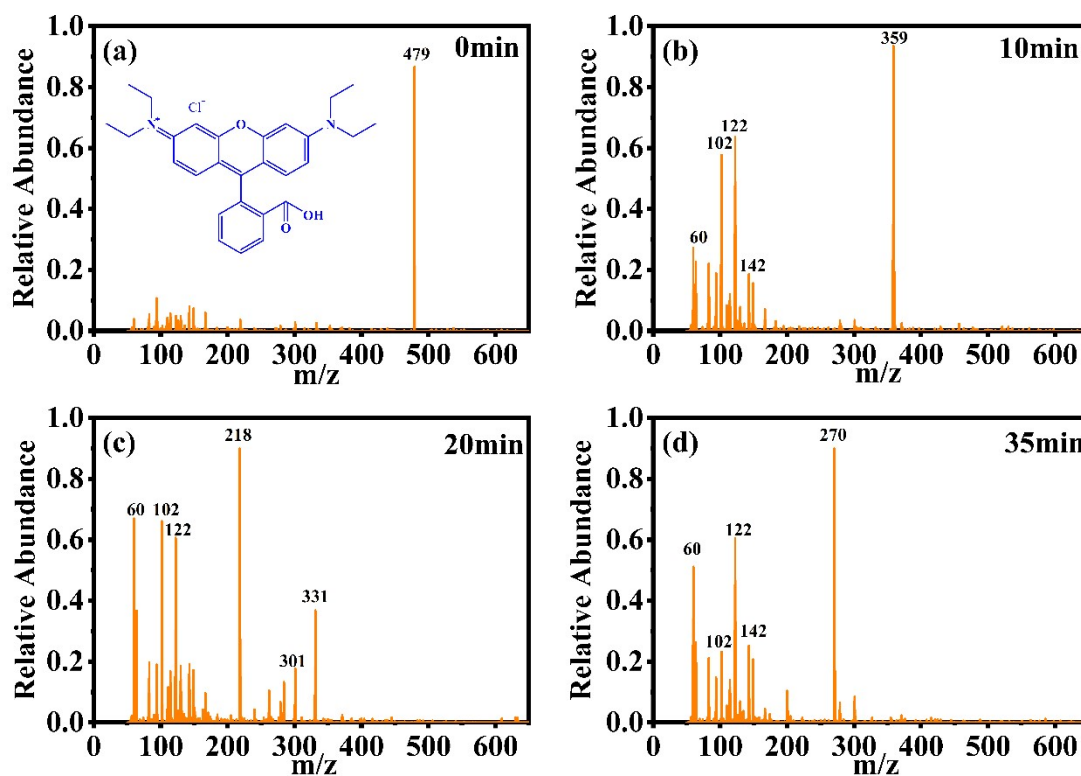

**Fig.S6** Variations in the relative intensity of intermediate products of RhB with

different reaction time, as obtained in the LC-MS spectra.

**Table.S1** Comparison of WO<sub>3</sub> based heterojunction for photocatalytic RhB degradation.

| <i>Catalyst / mg</i>                                  | <i>V (mL) / C<sub>-30</sub> (mg·L<sup>-1</sup>)</i> | <i>Light source</i> | <i>Time (min)</i> | <i>Result (%)</i> | <i>TOF</i> | <i>Ref</i> |
|-------------------------------------------------------|-----------------------------------------------------|---------------------|-------------------|-------------------|------------|------------|
| WO <sub>3</sub> /MoO <sub>3-x</sub> /10               | 50/30                                               | Sun light           | 40                | 98%               | 3.675      | This work  |
| WO <sub>3</sub> /g-C <sub>3</sub> N <sub>4</sub> /100 | 100/10                                              | Sun light           | 50                | 95.5%             | 0.191      | [1]        |
| WO <sub>3</sub> / UiO-66 /30                          | 100/20                                              | Sun light           | 100               | 96.6%             | 0.644      | [2]        |
| AC/WO <sub>3</sub> /10                                | 100/10                                              | Sun light           | 120               | 70%               | 0.583      | [3]        |
| WO <sub>3</sub> /Bi <sub>5</sub> O <sub>7</sub> I/10  | 50/10                                               | Sun light           | 80                | 99.6%             | 0.6225     | [4]        |
| MWCNT/WO <sub>3</sub> /10                             | 50/5                                                | Sun light           | 150               | 92%               | 0.153      | [5]        |

$$TOF = \frac{C_{-30} \times V_{RhB} \times \text{Degradation rate}}{m_{\text{photocatalyst}} \times t}$$

**Table.S2** Comparison of WO<sub>3</sub> Based heterojunction for photocatalytic H<sub>2</sub> evolution.

| <i>Photocatalysts/mg</i>                | <i>Light source</i> | <i>H<sub>2</sub> generation rate (μmol·g<sup>-1</sup>·h<sup>-1</sup>)</i> | <i>Ref</i> |
|-----------------------------------------|---------------------|---------------------------------------------------------------------------|------------|
| WO <sub>3</sub> /MoO <sub>3-x</sub> /30 | Sun light           | 4214.2                                                                    | This work  |
| WO <sub>3</sub> /rGO/Pt/50              | Sun light           | 825.8                                                                     | [6]        |
| Au/WO <sub>3</sub> /100                 | Sun light           | 472.71                                                                    | [7]        |

## References

- [1] Q. Zhao, S. Liu, S. Chen, B. Ren, Y. Zhang, X. Luo, Y. Sun, Facile ball-milling synthesis of WO<sub>3</sub>/g-C<sub>3</sub>N<sub>4</sub> heterojunction for photocatalytic degradation of Rhodamine B, Chemical Physics

Letters, 805 (2022).

- [2] F. Zhang, W. Cheng, Z. Yu, S. Ge, Q. Shao, D. Pan, B. Liu, X. Wang, Z. Guo, Microwave hydrothermally synthesized WO<sub>3</sub>/UiO-66 nanocomposites toward enhanced photocatalytic degradation of rhodamine B, *Advanced Composites and Hybrid Materials*, 4 (2021) 1330-1342.
- [3] M.B. Tahir, M. Ashraf, M. Rafique, M. Ijaz, S. Firman, I. Mubeen, Activated carbon doped WO<sub>3</sub> for photocatalytic degradation of rhodamine-B, *Applied Nanoscience*, 10 (2019) 869-877.
- [4] Y. Zhang, H. Liu, J. Peng, J. Guo, B. Wang, L. Ding, X. Cao, Y. Chang, G. Liu, Synthesis of 2D/2D direct Z-scheme WO<sub>3</sub>/Bi<sub>5</sub>O<sub>7</sub>I heterojunctions for decomposition and detoxification of organic compounds under simulated sunlight, *Applied Surface Science*, 614 (2023).
- [5] T.A. Saleh, V.K. Gupta, Functionalization of tungsten oxide into MWCNT and its application for sunlight-induced degradation of rhodamine B, *J Colloid Interface Sci*, 362 (2011) 337-344.
- [6] A.A. Yadav, Y.M. Hunge, S.-W. Kang, Porous nanoplate-like tungsten trioxide/reduced graphene oxide catalyst for sonocatalytic degradation and photocatalytic hydrogen production, *Surfaces and Interfaces*, 24 (2021).
- [7] J.C. Durán-Álvarez, R. Del Angel, D. Ramírez-Ortega, D. Guerrero-Araque, R. Zanella, An alternative method for the synthesis of functional Au/WO<sub>3</sub> materials and their use in the photocatalytic production of hydrogen, *Catalysis Today*, 341 (2020) 49-58.
